# Supplementary material for: Human induced pluripotent stem cell differentiation and direct transdifferentiation into corneal epithelial-like cells
Source: PubMed Central journal article supplement (PMC5173137; doi:10.18632/oncotarget.9791), 2016-06-02
Supplement: oncotarget-07-42314-s001.pdf [file oncotarget-07-42314-s001.pdf]

## Human induced pluripotent stem cell differentiation and direct transdifferentiation into corneal epithelial-like cells

### SUPPLEMENTARY FIGURES

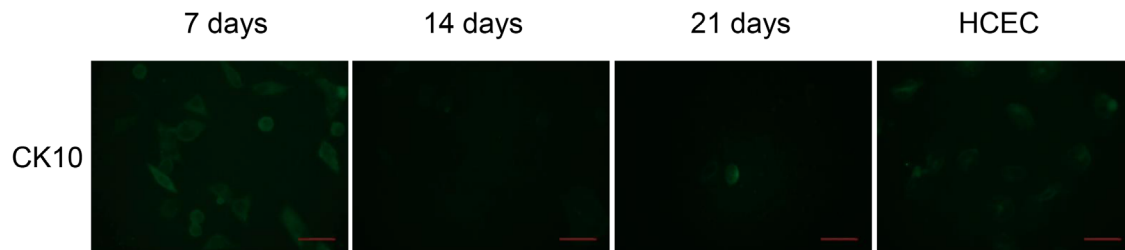

**Supplementary Figure S1: Differentiation of iPS cells to the corneal epithelial lineage.** Immunocytochemical analysis for expression of CK10 at day 7, day 14 and day 21. Scale bar: 50  $\mu$ m.

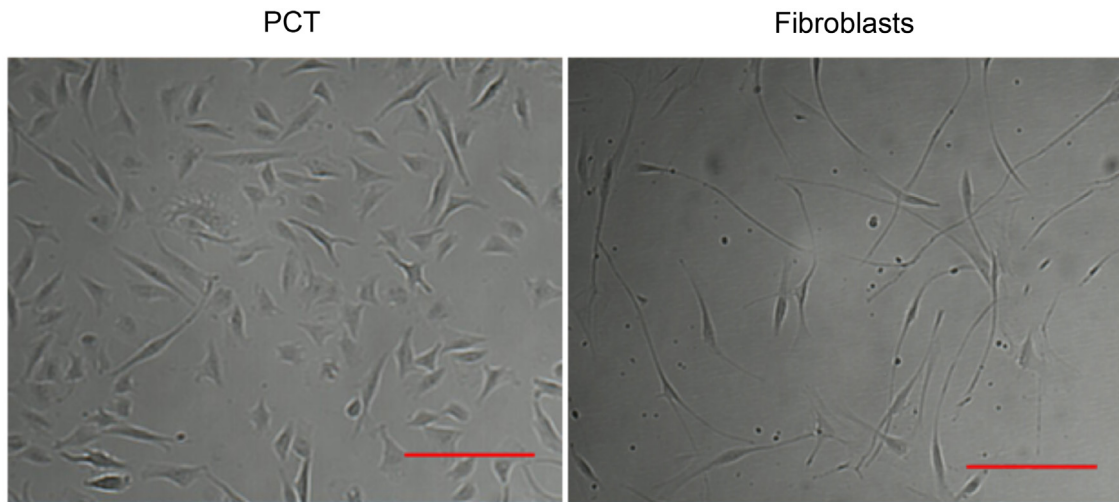

**Supplementary Figure S2: Comparison between untreated fibroblasts and fibroblasts directly transdifferentiated into corneal epithelial lineage.** Bright field images of transdifferentiated cells 7 days post infection with PCT and untreated fibroblasts. Scale bar: 200  $\mu$ m.

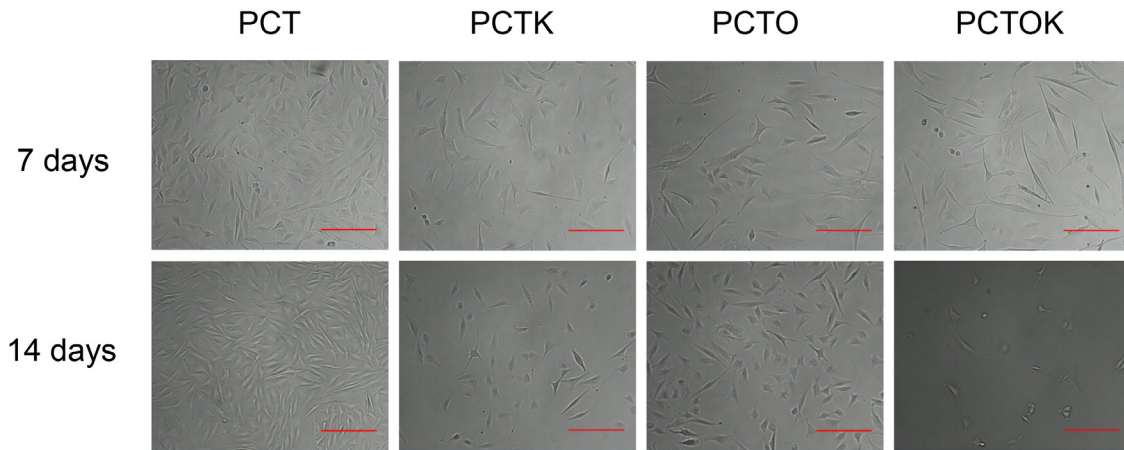

**Supplementary Figure S3: Fibroblasts directly transdifferentiated into corneal epithelial lineage for 7 and 14 days.** Bright field images of transdifferentiated fibroblasts 7 and 14 days post infection either with PCT, PCTK, PCTO or PCTOK. Scale bar: 200  $\mu\text{m}$ .
